# Supplementary material
Source: publisher figshare collection journal article supplement (https://acs.figshare.com/ndownloader/files/14005709)
Supplement: Supplementary file 1 [file 14005709]

# **Supporting Information**

## **Highly Crosslinked Shape Memory Polymers with Tunable Oxidative and Hydrolytic degradation Rates and Selected Products based on Succinic Acid**

Andrew C Weems<sup>1</sup>, Alexandra Easley<sup>1</sup>, Sydney Reese Roach<sup>1</sup>, Duncan J Maitland<sup>1\*</sup>

<sup>1</sup> Department of Biomedical Engineering, Texas A&M University, College Station, Texas, United States, 77840

\*Corresponding author: a.c.weems@bham.ac.uk

### **Supplemental Materials**

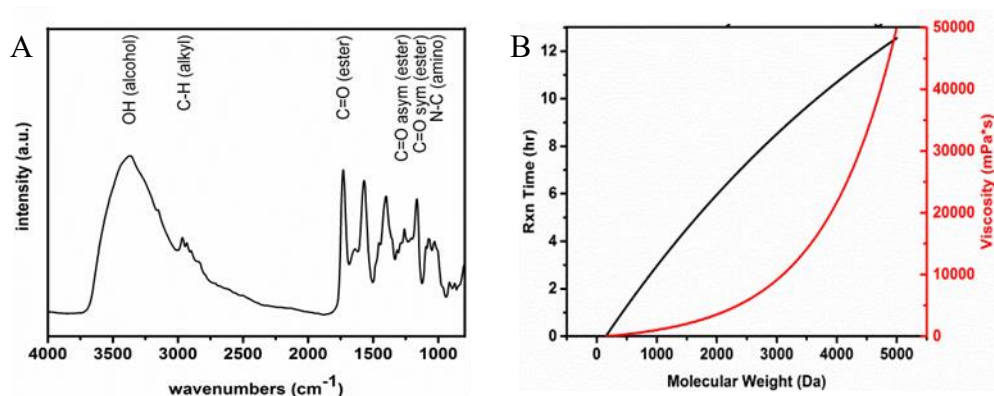

Figure S1. FTIR of the polyester network product (A), and the reaction time correlated with molecular weight and viscosity (B).

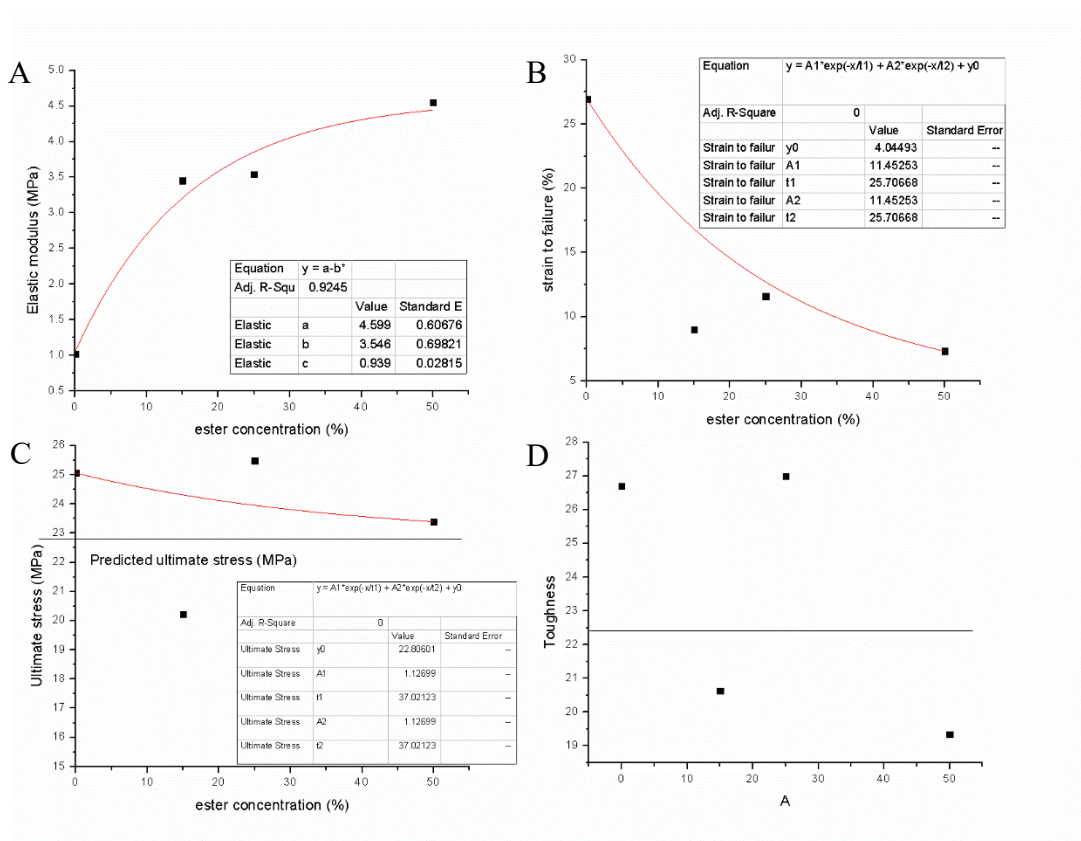

Figure S2. Mechanical plots displaying the impact of ester concentration on elastic modulus (A), strain to failure (B), ultimate stress (C), and toughness (D), with final property values calculated to 100% ester SMPs.

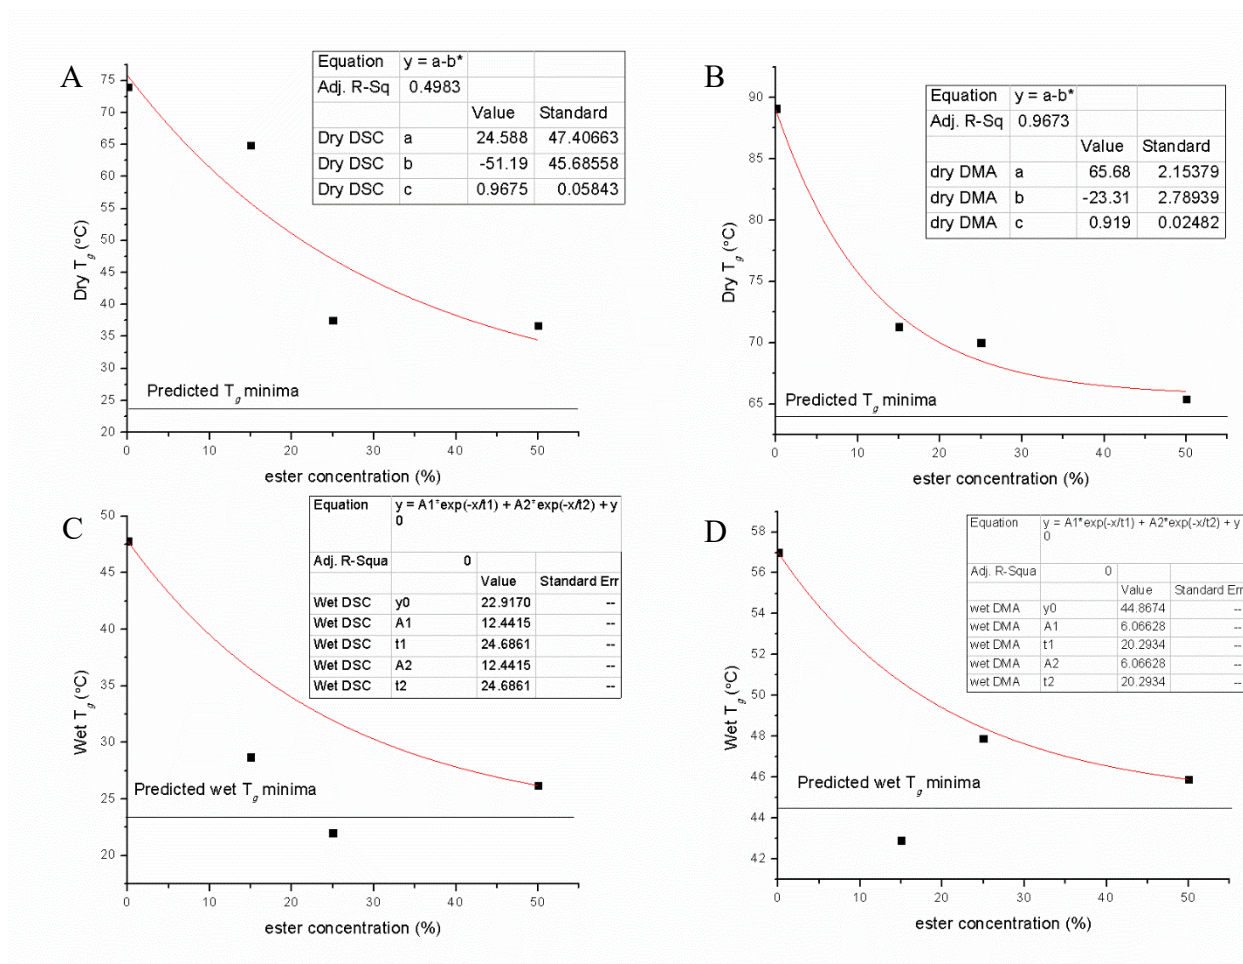

Figure S3. Glass transition temperature plots displaying the impact of ester concentration on the dry  $T_g$  measured by DSC (A), dry  $T_g$  measured by DMA (B), wet  $T_g$  measured by DSC (C), and wet  $T_g$  measured by DMA (D), with final property values calculated to 100% ester SMPs.

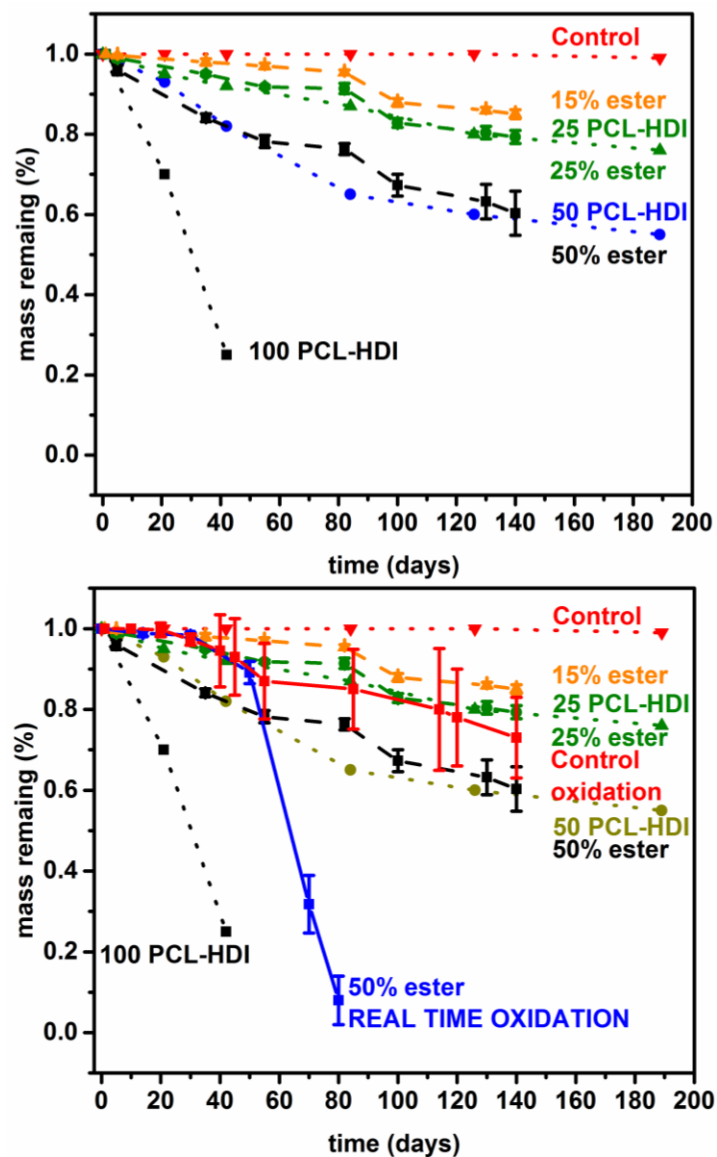

Figure S4. Comparison of the hydrolytic mass loss results obtained for Singhal's SMPs (denoted as ## PCL-HDI) and those demonstrated here for the crosslinked ester networks (###% ester). The comparison is important to make as the PCL networks display greatly reduced  $T_g$ s while the ester networks presented here still possess clinically relevant  $T_g$ .
